# Supplementary material for: Gold-Like Activity, Copper-Like Selectivity of Heteroatomic Transition Metal Carbides (M2C) for Electrocatalytic Carbon Dioxide Reduction Reaction
Source: Research Square preprint supplement (doi:10.21203/rs.3.rs-244769/v1), 2021-03-23
Supplement: Supplementary file 1 [file 644eb2899dc22706934c4b91.docx]

**Supplementary Materials**

**Gold-Like Activity, Copper-Like Selectivity of Heteroatomic Transition Metal Carbides (M2C) for Electrocatalytic Carbon Dioxide Reduction Reaction**

Mohammadreza Esmaeilirad1*, Artem Baskin2*, Alireza Kondori1, Ana Sanz Matias2, Jin Qian2, Boao Song3, Mahmoud Tamadoni Saray3, Kamil Kucuk4, Andres Ruiz Belmonte1, Pablo Navarro Munoz Delgado1, Junwon Park1, Rahman Azari5, Carlo U. Segre4, Reza Shahbazian-Yassar3, David Prendergast2†, Mohammad Asadi1†

1Department of Chemical and Biological Engineering, Illinois Institute of Technology, Chicago, IL 60616, USA.

2Molecular Foundry, Lawrence Berkeley National Laboratory, Berkeley, CA 94720, USA.

3Department of Mechanical and Industrial Engineering, University of Illinois at Chicago, Chicago, IL 60607, USA.

4Department of Physics & CSRRI, Illinois Institute of Technology, Chicago, IL 60616, USA.

5Department of Architecture, Illinois Institute of Technology, Chicago, IL 60616, USA.

*These authors equally contributed to this work.

†Corresponding authors: [dgprendergast@lbl.gov](mailto:dgprendergast@lbl.gov), [m.asadi@iit.edu](mailto:m.asadi@iit.edu)

**Table of Contents**

**S1- Catalysts Preparation**

**S1.1 Synthesis of Transition Metal Carbide Nanoflakes (TMC NFs)**

**S1.2 Synthesis of Copper Nanoparticles (Cu NPs)**

**S1.3 Preparation of Gold Nanoparticles (Au NPs)**

**S2- Two-Compartment Three-Electrode Electrochemical Cell**

**S3- Products Analysis and Faradaic Efficiency (FE) Measurements**

**S4- *In Situ* CO2RR Onset Potential Measurement of W2C NFs**

**S5- Turnover Frequency Measurements (TOF) of TMCs**

**S6- Tafel Plots of TMCs**

**S7- X-ray Photoelectron Spectroscopy (XPS) of TMCs**

**S8- X-ray Diffraction (XRD) patterns of TMC NFs**

**S9- Scanning Transmission Electron Microscopy (STEM) of TMCs**

**S10- Electrochemical Impedance Spectroscopy (EIS)**

**S11- Work Function Measurements – UPS method**

**S12- Theoretical Modeling and Calculations**

**S12.1 General Methodology**

**S12.2 Free Energy Calculations and Computational Hydrogen Electrode Model**

**S13- The Effect of Choline Chloride on the Electrochemical Performance of TMCs**

**S14- Stability Analysis of Choline Chloride Electrolyte using NMR experiments**

**S15- 13-C Labeled Carbon Dioxide (13CO2) Experiments**

**S16- Continuous Flow Electrolyzer Experiments: Methods and Materials**

**S17- Electrochemical Performance of the Solar-Powered Flow Cell: Methods and Materials**

**S1- Catalysts Preparation**

**S1.1 Synthesis of Transition Metal Carbide Nanoflakes (TMC NFs)**

Transition metal carbide nanoflakes (TMC NFs) *i.e.,* W2C, Nb2C, Mo2C and V2C NFs were synthesized using a carburization method under controlled environment. A specific amount of metal oxide powders [WO3, MO3, V2O5 and Nb2O5] (Sigma Aldrich)] were introduced on a quartz boat and carburized with a flowing mixture of methane (CH4) and hydrogen (H2). The flowing rate of mixed gas was 220 ml/g, including 22 ml/g CH4 (Airgas) and 198 ml.g H2 (Airgas). The temperature was increased from room temperature to 373 K and from 373 K to specific value for each TMCs with rates of 100 K/h and 50 K/h, respectively. The sample was then held at final temperature for 2 hours and cooled down to room temperature in the carburizing mixed gas. Next, in a custom-made liquid exfoliation method, the bulk of the synthesized catalysts were processed with an ultrasonic liquid processor (Sonics VibraCell VCX-130) to obtain W2C, Nb2C, Mo2C and V2C NFs. Basically, 300 mg of the bulk powder was dispersed in 60 mL isopropanol using the sonication probe for 10 hrs. The solution was further centrifuged at 1000 rpm for 30 min and the top two-thirds of the solution was collected and stored in vials.

**S1.2 Synthesis of Copper Nanoparticles (Cu NPs)**

Copper (II) nitrate trihydrate [Cu(NO3)2.3H2O] (Sigma Aldrich), carbon black (Fuel Cell store) and sodium hydroxide [NaOH] (Sigma Aldrich) were used in the heterogeneous deposition-precipitation (DP) method to synthesis of copper nanoparticles on carbon black (Cu NPs)1–6. The nitrate solution of copper (Cu) was prepared by adding 50 ml of deionized water to 670 mg of Cu salt. Then DP process was conducted for 12 hours on a magnetic hotplate at 363 K. Metal ions were precipitated on 1.1 g of carbon black by adding 40 ml of 6 wt.% NaOH solution in specific time intervals to obtain different sizes of Cu nanoparticles with 16 wt.% metal loading deposited on the carbon black. The solution containing so-called Cu nanoparticles were then rinsed with deionized water, filtered and dried in a vacuum oven at 383 K for overnight. The dried powders subsequently functionalized in a tubular furnace using a mixed hydrogen/argon flow with the H2:Ar volume ratio of 1:20 under a pressure of 100 torr for 4 hours at 773 K.

**S1.3 Preparation of Gold Nanoparticles (Au NPs)**

Gold (Au) nanoparticles (Alfa-Aesar, 99.99%) were used as received. A specific amount of Au nanoparticles was sonicated in isopropyl alcohol using a Branson 2800 ultrasonic processor, Cleanosonic. The prepared solution was subsequently used to coat the working electrodes for electrochemical experiments.

**S2- Two-Compartment Three-Electrode Electrochemical Cell**

As shown in Supplementary Fig. S1, a custom designed two-compartment three-electrode electrochemical cell was used to perform carbon dioxide reduction reaction (CO2RR). The catalysts were coated on a glassy carbon (GC) electrode, used as the working electrode, by drop casting method7. The catalyst loading on the electrode was precisely controlled to be 0.1 mg on the glassy carbon electrode with the surface area of 1 cm2.

**Supplementary Fig. S1 |** Photo of two-compartment three-electrode electrochemical cell.

Linear sweep voltammetry (LSV) experiments were performed to evaluate the overall catalytic activity of each synthesized catalyst. All experiments were performed under identical electrochemical conditions in the cell with 25 ml of a mixture of 3 M potassium hydroxide (KOH) and 2 M choline-chloride (KOH:CC (3M:2M))electrolyte saturated with CO2 (UHP 99.99%, Airgas)8. Platinum (Pt) gauze 52 mesh (Alfa Aesar) and Ag/AgCl (BASi) were used as counter and reference electrodes, respectively. The cathode and anode parts of the cell were separated through a frit to eliminate the effect of product oxidation at the anode surface.

pH of the solution before and after experiment was about 14.5±0.1 for all experiments using a Thermo Scientific Orion A111 pH meter. The cell was connected to the potentiostat (Biologic) for the electrolysis experiments. The LSV curves were obtained by sweeping a potential between +0.2 and -1.05 V vs. reversible hydrogen electrode (RHE) with scan rate of 20 mV/s. The current densities are normalized according to the geometrical surface area.

**Supplementary Fig. S2 |** Linear sweep voltammetry (LSV) results for W2C NFs, Mo2C NFs, Nb2C NFs, V2C NFs, Au NPs, and Cu NPs with respect to RHE at a scan rate of 20 mV/s.

The calibration of Ag/AgCl electrode was performed in a the three-electrode cell with polished Pt wires as the working and counter electrodes, the Ag/AgCl electrode as the reference electrode and 1 M sulfuric acid (H2SO4) solution as an electrolyte. The electrolyte was pre-purged and saturated with high purity hydrogen (H2) gas before calibration experiment. Linear sweep voltammetry (LSV) was then run at a scan rate of 0.5 mV/s, and the potential at which the current crossed zero was taken to be the thermodynamic potential for the hydrogen electrode reactions. The zero current point was at -0.210 V.

All potentials were converted to the RHE using Nernst equation (Equation S1) with and bulk pH of solution = 14.5:

*Potential in RHE = Applied potential vs Ag/AgCl + 0.210 V + 0.0592 × pH (*Equation S1)

**S3- Products Analysis and Faradaic Efficiency (FE) Measurements**

The products of electrocatalytic CO2RR were detected and quantified using a gas chromatograph (GC) of type SRI 8610C Multiple Gas Analyzer and differential electrochemical mass spectroscopy (DEMS, HPR-40, Hiden Analytical). The GC system comprised a sampling loop equipped with a flame ionization detector (FID) and a thermal conductivity detector (TCD). Ultra-high purity helium (He) and nitrogen (N2) (UHP 99.99%, Airgas) were used as the carrier gases to identify any possible type of product. The column oven was maintained at 40 ºC for 2 min followed by a temperature ramp at 20 ºC/min to 250 ºC which was held constant for 1 min for a precise product analysis. In order to measure the selectivity of the system, the signal response of the FID and TCD to each product was calibrated by analyzing a series of standard mixtures with known compositions prior to the experiments. The chronoamperometry (CA) experiments were performed in the two-compartment three-electrode electrochemical cell for 30 min at different potentials. To analyze the products of the electrochemical experiment, 1 ml samples were taken from the dead volume (15 ml) of the cell using a lock-in syringe (Hamilton) and injected into the gas chromatograph.

The *in situ* differential electrochemical mass spectrometry (DEMS) was used in this work to validate that the electrocatalytic performance of catalysts measured by GC*.* *In* situDEMS allows for the continuous detection of gaseous and volatile species produced during the electrochemical CO2RR even at trace amounts (partial pressures as low as 1 x 10-13 Torr). The analysis system consists of a commercial mass spectrometer (HPR-40, Hiden Analytical) and a custom-made capillary as the inlet. The electrochemical CO2 reaction products were continuously collected during the chronoamperometry experiments. Mass spectrometer settings were determined to be optimal for enhancing the signal to noise ratio of products. The signal responses of the DEMS instrument for different products were calibrated by feeding standard samples into the mass spectrometer. An electron energy of 70 eV was used for ionization of all species, with an emission current of 500 µA. The mass to charge ratios (m/z) of 2, 12, 15, 26, 31 and 46 were selected for measuring production of H2, CO, CH4, C2H4, CH3OH and C2H5OH respectively. All mass-selected product cations were detected by a secondary electron multiplier with a detector voltage of 1200 V for maximizing the signal to noise ratio of the products.

Equation S2 was used to measure FEs of catalysts at different applied potentials.

, (Equation S2)

Where in Equation S2, the experimental moles of products are obtained using the calibration curves. The theoretical mole of each product was also extracted by dividing the number of Coulombs by the number of electrons required (n) for formation of each product *e.g.*, H2, CO, CH4, C2H4, CH3OH and C2H5OH (nH2=2, nCO=2, nCH4=8, nC2H4=12, nCH3OH=6, nC2H5OH=12) multiplied by Faraday’s constant (96,485 C/mole) (Equation S3). FE measurements of catalysts at different potentials are presented in Supplementary Table S1.

**Supplementary Table S1 |** FE measurements of catalysts in the two-compartment three-electrode electrochemical cell at different potentials using KOH:CC (3M:2M).

| ***Catalyst*** | ***Potential (mV vs RHE)*** | ***FEH2 (%)*** | ***FECO (%)*** | ***FECH4 (%)*** | ***FEC2H4 (%)*** | ***FEMeOH (%)*** | ***FEEtOH(%)*** |
| --- | --- | --- | --- | --- | --- | --- | --- |
| W2C NFs | -122.7 | 98.03821 | 0.69473 |  |  |  |  |
| -150 | 98.13833 | 1.23069 |  |  |  |  |
| -250 | 94.75136 | 4.40023 |  |  |  |  |
| -310 | 92.01354 | 5.07349 |  |  |  |  |
| -450 | 38.56548 | 33.09669 | 20.4983 | 3.39188 | 0.35040 | 0.08952 |
| -550 | 14.95612 | 40.59594 | 37.09258 | 4.04116 | 0.50832 | 0.19872 |
| -650 | 10.24194 | 36.69633 | 44.29114 | 4.90434 | 0.67275 | 0.50543 |
| -750 | 1.449726 | 27.39726 | 61.38772 | 5.82408 | 1.24858 | 0.83515 |
| -850 | 1.089321 | 13.39866 | 74.38512 | 6.93051 | 1.55406 | 1.35600 |
| -950 | 2.283232 | 13.79892 | 73.38572 | 6.17138 | 1.41386 | 1.21324 |
| -1050 | 2.622896 | 13.59914 | 73.08598 | 6.21035 | 1.18453 | 1.03392 |
| Mo2C NFs | -310 | 96.71945 | 2.91868 |  |  |  |  |
| -450 | 46.4846 | 25.14928 | 26.1234 | 0.38027 | 0.06386 |  |
| -550 | 29.87478 | 32.44245 | 35.59428 | 0.97068 | 0.120872 | 0.03352 |
| -650 | 20.39595 | 36.33299 | 41.72814 | 1.03072 | 0.19166 | 0.14755 |
| -750 | 7.7723 | 43.14587 | 47.61159 | 1.0007 | 0.28815 | 0.22775 |
| -850 | 7.68397 | 40.3672 | 50.65557 | 0.83058 | 0.40711 | 0.34446 |
| -950 | 8.70298 | 40.37661 | 49.31236 | 0.76053 | 0.33095 | 0.30734 |
| -1050 | 9.43316 | 39.37781 | 48.61174 | 0.62043 | 0.28939 | 0.27005 |
| Nb2C NFs | -310 | 95.56138 | 4.98663 |  |  |  |  |
| -450 | 53.69744 | 39.8302 | 3.84532 |  |  |  |
| -550 | 22.8952 | 58.2648 | 16.61241 |  | 0.04349 |  |
| -650 | 12.5994 | 54.9375 | 30.18055 | 0.713562 | 0.10097 | 0.04714 |
| -750 | 8.3996 | 51.3644 | 36.20461 | 1.156693 | 0.20974 | 0.05271 |
| -850 | 5.7804 | 48.6891 | 41.22841 | 1.455176 | 0.27373 | 0.11345 |
| -950 | 5.8696 | 45.2095 | 45.37916 | 1.798176 | 0.29049 | 0.12198 |
| -1050 | 4.3396 | 43.4630 | 47.59129 | 1.923171 | 0.29421 | 0.15418 |
| V2C NFs | -310 | 98.03052 | 1.21974 |  |  |  |  |
| -450 | 54.9035 | 42.2965 |  |  |  |  |
| -550 | 33.13971 | 55.9612 | 9.0990 |  | 0.0275 |  |
| -650 | 25.26626 | 60.3895 | 12.3391 | 0.6050 | 0.0858 | 0.0227 |
| -750 | 20.38106 | 57.2617 | 20.2890 | 0.7681 | 0.1848 | 0.0321 |
| -850 | 15.72569 | 54.4701 | 27.4469 | 1.1572 | 0.2341 | 0.0632 |
| -950 | 10.09962 | 51.6829 | 33.3631 | 1.4542 | 0.2613 | 0.0654 |
| -1050 | 9.70612 | 49.0069 | 36.7280 | 1.5788 | 0.2587 | 0.0851 |
| Au NPs | -450 | 88.8327 | 8.55599 |  |  |  |  |
| -550 | 68.9924 | 29.75408 |  |  |  |  |
| -650 | 35.9947 | 62.63814 |  |  |  |  |
| -750 | 29.7106 | 68.49212 |  |  |  |  |
| -850 | 26.8223 | 71.2194 |  |  |  |  |
| -950 | 23.3358 | 74.09392 |  |  |  |  |
| -1050 | 20.3238 | 75.78839 |  |  |  |  |
| Cu NPs | -750 | 73.32156 | 20.84832 |  |  |  |  |
| -850 | 54.20106 | 37.13029 | 1.23324 | 0.95769 |  |  |
| -950 | 27.55689 | 38.29192 | 12.59866 | 6.02783 | 1.8751 | 7.43279 |
| -1050 | 10.23211 | 28.06677 | 30.57782 | 13.61896 | 2.78253 | 10.89543 |

The partial current densities of different products were calculated by considering the FE measurements and the total current densities of synthesized catalysts over the studied range of cell potentials. Supplementary Fig. S3 indicates different products partial current densities of TMCs, Au NPs and Cu NPs in the three-electrode cell.

**Supplementary Fig. S3 |** **Catalytic performance of W2C NFs, Mo2C NFs, Nb2C NF, V2C NFs compared to Au NPs and Cu NPs.** **(a)** C2H4 **(b)** CO, **(c)** CH3OH and **(d)** C2H5OH. All experiments were performed in the two-compartment three-electrode electrochemical cell using CO2 saturated KOH:CC (3M:2M).

We also compared the maximum CO2RR and maximum CH4 formation current densities of TMCs with state-of-the-arts catalysts in the literature. The data points shown in Supplementary Table S2 were extracted at the maximum CO2RR and CH4 formation faradaic efficiencies of our catalysts as well as others in the literature.

**Supplementary Table S2 |** Electrocatalytic performance of TMC NFs, *i.e.*, W2C, Nb2C, Mo2C, and V2C NFs for in CO2RR compared to the state-of-the-art electrocatalysts in literature. The data shown in this table are calculated at the maximum CO2RR faradaic efficiency of each catalyst.

| 1. Maximum CO2 reduction reaction current densities (*j*CO2RR) | | | | | |
| --- | --- | --- | --- | --- | --- |
| **Catalyst** | ***j*CO2RR** | **Potential(V vs RHE)** | **Electrolyte** | **pH** | **Ref.** |
| W2C NFs | -548.89 | -1.05 | KOH:CC (3M:2M) | 14.5 | This study |
| Nb2C NFs | -419.85 | -1.05 | KOH:CC (3M:2M) | 14.5 | This study |
| Mo2C NFs | -381.86 | -1.05 | KOH:CC (3M:2M) | 14.5 | This study |
| V2C NFs | -350.79 | -1.05 | KOH:CC (3M:2M) | 14.5 | This study |
| Cu-N | -320 | -1 | 1M KOH | N/C | 9 |
| Au NPs | -208.11 | -1.05 | KOH:CC (3M:2M) | 14.5 | This study |
| Ni-N-C | -200 | -1.25 | 1M KHCO3 | 6.8 | 10 |
| Co | -175 | -1.25 | 1M KOH | N/C | 11 |
| NGQDs | -149 | -1.05 | 1M KOH | 13.48 | 12 |
| Cuoh | -120 | -0.96 | 1M KOH | 13.78 | 13 |
| ERD-Cu | -110 | -1.4 | 0.5M KHCO3 | 7.2 | 14 |
| 1. Maximum CH4 formation current densities (*j*max. CH4) | | | | | |
| **Catalyst** | ***j*CH4** | **EWE (V vs RHE)** | **Electrolyte** | **pH** | **Ref.** |
| W2C NFs | -421.63 | -1.05 | KOH:CC (3M:2M) | 14.5 | This study |
| Nb2C NFs | -219.16 | -1.05 | KOH:CC (3M:2M) | 14.5 | This study |
| Mo2C NFs | -211.33 | -1.05 | KOH:CC (3M:2M) | 14.5 | This study |
| V2C NFs | -147.56 | -1.05 | KOH:CC (3M:2M) | 14.5 | This study |
| La2CuO4 | -117 | -1.4 | 1M KHCO3 | 6.8 | 15 |
| Cu | -112.5 | -1.4 | 1M KHCO3 | N/C | 16 |
| Cu-N | -100 | -1 | 1M KOH | N/C | 9 |
| Cuoh | -83 | -0.96 | 1M KOH | 13.78 | 13 |
| OFn-Cu | -39 | -1.15 | 1M KHCO3 | 8 | 6 |
| Cu NPs | -31.86 | -1.05 | KOH:CC (3M:2M) | 14.5 | This study |
| NGQDs | -30 | -1.05 | 1M KOH | 13.48 | 12 |
| CuPc | -13 | -1.06 | 0.5M KHCO3 | N/C | 17 |
| n-Cu/C | -10.2 | -1.45 | 0.5M NaHCO3 | 6.8 | 18 |

**S4- *In Situ* CO2RR Onset Potential Measurement of W2C NFs**

*In situ* differential electrochemical mass spectrometry (DEMS) was used to measure the starting potential of CO2RR. The potential was swept between +110 to -250 mV vs RHE with a low scan rate of 5 mV/s to measure pressure fluctuations in the chamber as a function of applied potential. At the same time, the variation of CO partial pressure was monitored to detect any product formation under the applied potentials. As shown in Supplementary Fig. S4, the partial pressure variation of CO increases with the applied potential following the LSV plot trend. The recorded CO formation onset potential of -0.1227 V for W2C NFs is 12.7 mV higher than the thermodynamic value of CO2 reduction to CO potential (-110 mV vs RHE) in eCO2RR.

**Supplementary Fig. S4 |** In-situ differential electrochemical mass spectrometry (DEMS) results of W2C NFs. The CO partial pressure as a function of potential and corresponding LSV curve are shown.

**S5- Turnover Frequency Measurements (TOF) of TMCs**

Turnover frequency (TOF) of TMC NFs were measured using roughness factor (RF) method to compare the actual catalytic activity of different catalysts in the electrochemical CO2RR. To do so, the double layer capacitance (Cdl) of each catalyst were measured by performing cyclic voltammetry (CV) experiments in non-faradaic region at different scan rates. 0.1 M HClO4 solution and Ag/AgCl electrode were used as an electrolyte and reference electrode, respectively. The CV results are shown in Supplementary Fig. S5

**Supplementary Fig. S5 |** Cyclic voltammetry (CV) experiments for **(a)** W2C NFs **(b)** Mo2C NFs **(c)** Nb2C NFs **(d)** V2C NFs **(e)** Cu NPs and **(f)** Au NPs in non-faradaic region at different scan rates.

The Cdl value for each catalyst was then calculated from the slope of the “current density – scan rate” plot as shown in Supplementary Fig. S6.

**Supplementary Fig. S6 |** Double layer capacitance measurements for different catalysts.

The TOF of each catalyst then calculated from Equation S3 where the flat standard capacitor is extracted from literature.

(Equation S3)

Where density of active sites was calculated by Equation S4:

(Equation S4)

And RF values for different catalysts were measured using Equation S5.

(Equation S5)

The summary of active sites and RF calculations for different catalysts are presented in Supplementary Table S3.

**Supplementary Table S3 |** Summary of active sites and RF calculations for studied catalysts.

| **Catalyst** | **W2C** | **Mo2C** | **Nb2C** | **V2C** | **Au** | **Cu** |
| --- | --- | --- | --- | --- | --- | --- |
| **Flat standard capacitor (μF/cm2)**19 | 60 | 60 | 60 | 60 | 20 | 20 |
| **No. of metal atoms for flat standard capacitor (x 10-15)** | 1.22 | 1.27 | 1.24 | 1.29 | 3.04 | 3.18 |
| **Double layer capacitor (mF/cm2)** | 1.58 | 1.94 | 2.11 | 1.92 | 2.12 | 1.03 |
| **Roughness factor (RF)** | 26.33 | 32.33 | 35.33 | 32 | 106 | 53 |
| **No. of metal atoms per cm2(x 1016)** | 3.2 | 3.95 | 4.38 | 4.12 | 33.8 | 16.1 |

Supplementary Fig. S7 shows CH4 production and total CO2RR TOF measurements for the studied catalysts in the three-electrode electrochemical cell.

**Supplementary Fig. S7 |** **Turnover frequency (TOF) measurements of studied catalysts in three-electrode cell as a function of potential.** **(a)** CH4 formation TOF **(b)** CO formation TOF **(c)** C2H4 formation TOF **(d)** CH3OH formation TOF **(e)** C2H5OH Formation TOF and **(f)** total CO2RR TOF values of W2C NFs, Mo2C NFs, Nb2C NFs, V2C NFs, Au NPs and Cu NPs at different potentials.

**S6- Tafel Plots of TMCs**

The Tafel plots for CH4, CO, and C2H4 products were plotted to study the kinetic behavior for formation of each product using W2C, Mo2C, Nb2C, V2C NFs, and Cu NPs. Supplementary Figs. S8a-c show the Tafel plots for CH4, CO, and C2H4 products, respectively. Our Tafel plot analyses show that TMCs possess steeper Tafel slopes, and therefore a weaker potential dependence compared with Cu NPs for the formed products (i.e., CO, CH4 and C2H4). This can be correlated to protonation of *CO intermediate as the rate-limiting step that is different than that of Cu catalyst where the C-O bond scission prior to *CO protonation is the rate determining step. Details are discussed in the theoretical study section (Supplementary section S12).

**Supplementary Fig. S8 |** Tafel plots (potential vs partial current density of CH4, C2H4 and CO formation) measured for TMCs and Cu NPs.

**S7- X-ray Photoelectron Spectroscopy (XPS) of TMC NFs**

X-ray photoelectron spectroscopy (XPS) spectra of synthesized transition metal carbides were obtained using a Thermo-Scientific ESCALAB 250Xi instrument equipped with an electron flood and scanning ion gun where the pressure of the analysis chamber was less than 2 x 10-9 Torr. The XPS instrument was calibrated prior to the experiments with binding energies all referenced to the Au 4f7/2 at 83.96 eV and Ag 3d5/2 at 368.27 eV. All samples were irradiated by a monochromatic Al-Kα X-ray source. All scans were acquired with a pass energy of 20 eV, 0.05 eV step size and dwell time of 200 ms using a charge neutralization system (an ion flood gun). The data processing was performed using the Avantage software such that W 4f, Mo 3d, Nb 3d and V 2p spectra were calibrated against the binding energy (BE) for adventitious carbon peak detected as a sharp intensity peak in the C 1s region (284.8 eV). For the curve-fitting, a Shirley background was used to consider the inelastic scattering. Supplementary Figs. S9a-d indicates the XPS spectra of W2C, Mo2C, Nb2C and V2C NFs. The XPS spectrum of W2C NFs depicts three pronounced peaks centered at 31.7, 33.8 and 37.4 which are attributed to 4f7/2, 4f5/2 and 5p3/2 20–22. The XPS spectra of Mo2C NFs also show the spin orbit split 3d peaks of 3d5/2 at binding energy of 228.3 eV and 3d3/2 at binding energy of 231.1 eV 23. Similar to Mo2C NFs, two peaks correspond to 3d5/2 and 3d3/2 at binding energies of 203.5 and 205.4 eV were observed in the XPS spectrum of Nb2C NFs 24. The XPS spectrum of V2C NFs also indicates two peaks, corresponding to 2p3/2 and 2p1/2 at binding energies of 524.1 and 516.8 eV, respectively 25.

**Supplementary Fig. S9 |** X-ray photoelectron spectra of **(a)** W2C NFs **(b)** Mo2C NFs **(c)** Nb2C NFs and **(d)** V2C NFs.

**S8- X-ray Diffraction (XRD) patterns of TMCs**

The phase purity and crystallinity of synthesized samples were characterized by Bruker D2 PHASER diffractometer in Bragg–Brentano geometry employing a Ni filtered Cu *K*α radiation (1.5405 Å). The X-ray diffraction (XRD) patterns were obtained using a LynxEye linear position sensitive detector and a step width of 0.2 °2θ with a counting time of 1 s/step. All other parameters were chosen to enhance the signal to noise in diffractograms. The XRD patterns of TMC NFs, Au NPs, and Cu NPs are shown in Supplementary Figs. S10a-f.

**Supplementary Fig. S10 |** X-ray diffraction (XRD) patterns of **(a)** W2C NFs, **(b)** Mo2C NFs **(c)** Nb2C NFs, **(d)** V2C NFs, **(e)** Cu NPs and **(f)** Au NPs

The size of the coherently diffracting domains for synthesized TMC NFs, Au and Cu NPs were obtained using GSAS-2 software26. The Rietveld method was employed to refine and minimize the difference between the measured diffraction pattern and the standard phase patterns of each sample.26 Then, the Bragg peaks of spectra were considered to calculated the crystallite sizes of synthesized catalysts using Scherrer equation27,28.

(Equation S6)

Where is the wavelength of the X-rays (X-ray tube: Cu, 𝜆 = 0.154 nm), K is a numerical factor frequently referred to as the crystallite-shape factor. Xinst is the instrument broadening, and LX is the refined Lorentzian coefficient for size-type broadening26. Summary of the average crystallite sizes of catalysts are shown in Supplementary Table S4.

**Supplementary Table S4 |** Crystallite sizes of TMC NFs, Au and Cu NPs.

| ***Sample*** | ***Ave. crystallite Size (nm)*** |
| --- | --- |
| W2C NFs | 23.7 |
| Mo2C NFs | 21.4 |
| Nb2C NFs | 29.5 |
| V2C NFs | 27.2 |
| Au NPs | 31.6 |
| Cu NPs | 5.7 |

**S9- Scanning Transmission Electron Microscopy (STEM) of TMCs**

The scanning transmission electron microscopy (STEM) imaging was conducted using a spherical aberration corrected JEOL JEM-ARM 200CF with a cold field emission gun operating at 200 kV. High-angle annular dark-field (HAADF) detector with 22 mrad inner-detector angle and bright field (BF) detector were utilized to obtain the atomic resolution images. Supplementary Fig. S11 shows the atomic scale characterization results of synthesized W2C NFs. Supplementary Fig. S11a shows overall morphonology of the nanoflakes, and Supplementary Figs. S11b and S11c show HAADF and BF images of W2C in <101> zone axis. The corresponding fast Fourier transform (FFT) in Supplementary Fig. S11d indicates diffraction spots from <101> zone axis. Supplementary Fig. S11e show the atomic model in same zone axis. A zoom in of BF image in Supplementary Fig. S11f indicates the C atomic columns and distance between two C atoms is 2.55 Å.

**Supplementary Fig. S11 | (a)** HAADF image of W2C NFs. **(b)(c)** HAADF and BF images of W2C in <101> zone axis. **(d)** FFT corresponding to b and c showing the diffraction spots from <101> zone axis. **(e)** Atomic model of W2C in <101> zone axis. W is shown as blue and C as white spheres. **(f)** Zoom in of S11c showing the C atomic columns in red box. The inset is intensity profile across red box region showing distance between two C atoms is 2.55 Å.

Supplementary Fig. S12 depicts STEM images of synthesized Mo2C NFs. Morphology of NFs is shown in Supplementary Figs. S12a and 12b, as its layered structure is obvious from BF image, Supplementary Fig. S12b.Tthe corresponding fast Fourier transform (FFT) in Supplementary Fig. S12c indicates highlighted diffraction spots from <010> zone axis corresponding to (002), (101) and (100) planes. Supplementary Figs. 12d and 12e show high resolution HAADF with measured d‐spacings of 2.31 Å for (101) plane and 2.33 Å for (002) plane with angle between them and BF images of Mo2C in <010> zone axis, respectively. Supplementary Fig. S12f depicts visual atomistic-level of detailed structure in the same zone axis.

**Supplementary Fig. S12 |** **(a)** Low-angle annular dark field (LAADF) STEM and, **(b)** corresponding BF images of Mo2C NFs. **(c)** FFT corresponding to b illustrating the diffraction spots from the <010> zone axis. **(d)(e)** HAADF and BF images of Mo2C showing the atomic structure in the <010> zone axis. **(f)** Atomic model of Mo2C in <010> zone axis. Mo is shown as red and C as white spheres.

Supplementary Fig. S13 depicts STEM results of synthesized Nb2C NFs. Morphology of NFs is shown in Supplementary Fig. S13a and 13b, and the corresponding fast Fourier transform (FFT) in Supplementary Fig. S13c indicates highlighted diffraction spots from <210> zone axis corresponding to () and (002) planes. Supplementary Figs. 13d and 13e show high resolution HAADF with measured d‐spacings of 2.49 Å for (002) plane and BF images of Nb2C in <210> zone axis, respectively. Supplementary Fig. S13f depicts visual atomistic-level of detailed structure in the same zone axis.

**Supplementary Fig S13 | (a)(b)** HAADF images of Nb2C NFs. **(c)** FFT corresponding to b illustrating the diffraction spots from <210> zone axis. **(d)(e)** HAADF and BF images of Nb2C in <210> zone axis. **(f)** Atomic model of Nb2C in <210> zone axis. Nb is shown as green and C as white spheres.

Supplementary Fig. S14 depicts STEM images of synthesized V2C NFs. Morphology of NFs is shown in Supplementary Fig. S14a and 14b, and the corresponding fast Fourier transform (FFT) in Supplementary Fig. S14c indicates highlighted diffraction spots from <> zone axis corresponding to (002) and (110) planes. Supplementary Figs. 14d and 14e show high resolution HAADF with measured d‐spacings of 2.28 Å for (002) plane and BF images of V2C in <> zone axis, respectively. Supplementary Fig. S14f depicts visual atomistic-level of detailed structure in the same zone axis.

**Supplementary Fig. S14 | (a)(b)** HAADF images of V2C NFs. **(c)** FFT corresponding to b illustrating the diffraction spots from <> zone axis. **(d)(e)** HAADF and BF images of V2C in <> zone axis. **(f)** Atomic model of V2C in <> zone axis. V is shown as purple and C as white spheres.

Furthermore, we performed Scanning transmission electron microscopy-energy‐dispersive X‐ray spectroscopy (STEM‐EDS) mapping to study the elemental distribution of catalysts. The results are shown in Supplementary Figs. S15-18 reveal uniform elemental distribution and compositions confirming empirical formula of M2C (M= W, Mo, Nb, V) for all synthesized TMCs.

**Supplementary Fig. S15 |** EDS element mappings of W2C. **(a)** HAADF image of W2C, **(b,c)** EDS mappings of W and C elements, **(c)** EDS spectrum and atomic percentage elemental analysis.

**Supplementary Fig. S16 |** EDS element mappings of Mo2C. **(a)** HAADF image of Mo2C, **(b,c)** EDS mappings of Mo and C elements, **(c)** EDS spectrum and atomic percentage elemental analysis.

**Supplementary Fig. S17 |** EDS element mappings of Nb2C. **(a)** HAADF image of Nb2C, **(b,c)** EDS mappings of Nb and C elements, **(c)** EDS spectrum and atomic percentage elemental analysis.

**Supplementary Fig. S18 |** EDS element mappings of V2C. **(a)** HAADF image of V2C, **(b,c)** EDS mappings of V and C, (c) EDS spectrum and atomic percentage elemental analysis.

**S10- Electrochemical Impedance Spectroscopy (EIS)**

In order to compare the charge transfer resistance (Rct) of the developed TMC catalysts, we performed EIS experiments at the low overpotential of -310 mV vs RHE where the electrochemical results and product stream analysis showed that hydrogen evolution reaction (HER) and the electroreduction of CO2 to CO are the only reactions happening at the surface of all the studied catalysts. The EIS experiments were performed under identical experimental conditions that includes factors such as mass loading (0.1 mg of each catalyst deposited on a glassy carbon substrate), surface area (1 cm2), roughness factors (in a range of ~26-35, Supplementary section S5) inside a three-electrode electrochemical cell comprised of the catalysts as the working electrodes, platinum (Pt) gauze 52 mesh (Alfa Aesar) as the anode and Ag/AgCl (BASi) as the reference electrode. The Nyquist plots for different catalysts were recorded at a small amplitude of 10 mV and over a frequency range of 1 to 2 × 105 Hz. Supplementary Fig. S19 show the fitted EIS spectra of each TMC catalyst at potentials of -310 mV vs RHE using Randles circuit model.

**Supplementary Fig. S19 |** Electrochemical impedance spectroscopy (EIS) for studied catalysts at a potentials of -310 mV vs RHE in three-electrode electrochemical cell using KOH:CC (3M:2M).

A potential of -310 mV vs RHE is selected for our EIS experiment because it allows for precise measurement of the Rct of each catalyst where the only happening reactions at TMC surfaces are the HER and the eCO2RR to produce CO. In more details, the charge transfer resistance (Rct) for each catalyst can be calculated using Equation S7.

(Equation S7)

Where R is the universal gas constant, T is the temperature, F is the Faraday number, n is number of transferred electrons, and i0 is exchange current density.

Since two competing reactions (HER and CO2 reduction to CO) are happening in parallel on TMC catalyst surfaces, the observed Rct, overall values in Nyquist plots are a combination of the Rct values for HER (Rct,H2) and CO2 reduction to CO (Rct,CO) as shown in Equation S8:

(Equation S8)

By implementing Rct for HER and CO2 reduction to CO from Equation S7 and assumption of no other reactions involved in the process at -310 mV (that is a valid assumption based on our product stream analysis), the Rct, overall becomes:

(Equation S9)

Considering nH2 and nCO = 2 the overall Rct is

(Equation S10)

whereas i0,H2 and i0,CO are dependent on the intrinsic properties of the studied TMC catalysts. Therefore, as shown in Equation S10, the Rct, overall value observed in each catalyst at this potential (-310 mV vs. RHE) becomes only dependent on the summation of exchange current densities for HER (i0,H2) and CO2 reduction to CO (i0,CO). This rationale, being valid at this low potential, enables us to conclude that the intrinsic electrocatalytic activity of W2C is higher than that of other studied TMC catalysts.

**S11- Work Function Measurements - UPS Method**

To obtain more insight into the origin of the CO2RR activity of TMC NFs, we compared the surface work function of TMC NFs that can be correlated to the surface activity of them. The surface work function measurements were carried out using a Thermo Scientific ESCALAB 250XI photoelectron spectrometer with He I (21.2 eV) ultraviolet radiation and the pass energy of 8.95 eV. All measurements were referenced to a gold foil.

**S12- Theoretical Modeling and Calculations**

**S12.1 General Methodology**

To perform a comparative analysis of catalytic activity and reactivity we used density functional theory29,30 Using the SIESTA package31, we estimated the equilibrium configurations and density of states of model Au (111) and M2C (101) (M = W, V, Mo, Nb) extended surfaces, modeled as slabs under periodic boundary conditions. The M2C model structures were assumed to be in the 1T phase, belonging to the [P3¯m1] space group, as per the experimental characterization.All slab structures were carved out from bulk structures. To this end, the lattice parameters and atomic positions of bulk Au and M2C were optimized using the PBE functional32 with a double-zeta with polarization (DZP) localized basis set. The core electrons were represented via Troullier-Martins norm-conserving pseudopotentials33. Converged Monkhorst-Pack 34 k-point grids of size 9 x 9 x 9 were used to sample the Brillouin zone, together with a plane-wave cutoff of 300.0 Ry. The atomic positions were optimized using the conjugate-gradient algorithm until the maximum atomic force was lower than 0.04 eV/Å, and the cell parameters until the maximum stress component along each periodic direction was below 1 GPa. First, we optimized the positions and lattice parameters of the Au and M2C bulk structures with increasing k-point grid densities until the change in energy was below 0.01 eV. The cell parameters were optimized until the maximum stress component along each periodic direction was below 1 GPa. The results are shown in Supplementary Table S5.

**Supplementary Table S5 |** Bulk phase results: converged k-point grid, calculated lattice parameters and lattice parameters in the literature.

|  |  | Calculated | | | Literature | |
| --- | --- | --- | --- | --- | --- | --- |
| Material | Phase | K-point grid | a | c | a | c |
| V2C | hP3/p_3m1/164 | 9x9x9 | 2.893 | 4.532 | 2.89,2.897 | 4.36 |
| Nb2C | hP3/164 | 7x7x7 | 3.349 | 5.349 | 3.12, 3.153 | 4.97, 5.004 |
| Mo2C | p_3m1/162 | 5x5x5 | 3.082 | 4.674 | 3.005 | - |
| W2C | hP3/p_3m1/164 | 7x7x7 | 3.054 | 4.650 | 3.001 | 4.728 |
| Au | fcc | 9x9x9 | 4.027 | - | 4.0826 | - |

Specifically, the resulting cell parameters of Au are in good agreement with the literature: a=4.027 Å, compared to a=4.08 Å 35. The calculated lattice parameters of W2C are in good agreement with the aforementioned XRD (Supplementary Fig. S10) and TEM results (Supplementary Fig. S11). The space group is [P3¯m1], and the calculated and experimental lattice parameters are, respectively, a=3.045 Å, c=4.669 Å and a=3.070 Å, c=4.678 Å; with ==90° and =120° in both cases.

All slab structures were generated from the relaxed bulk structures by creating supercells of size 1 x 1 x N (where N is 2 and 5 for Au and 5 and 7 for TMCs). The surface atomic positions were relaxed on each slab, with fixed bulk lattice parameters and the positions of the atoms in the center of the slab, in order to mimic the bulk conditions at the center of the slab. A vacuum of more than 12 A in the direction perpendicular to the surface was added in all calculations so as to avoid spurious interactions between periodic images. The k-point grid used for each slab in the x and y direction was the same as shown in Supplementary Table S5, while 1 k-point was enough to sample the Brillouin zone in the direction perpendicular to the slab.

We carried out a comparison of surface energies between different terminations that appear in the XRD profiles of the metal carbides using 5-layer slabs. The surfaces terminations included are the (101), (100), (002) and (102) planes, as well as the (111), which does not appear as a peak on the experimental XRD characterization of any of the materials, for comparison. The slab structures are shown on Supplementary Figure S20. Noticeably, all slabs except for the (111)-terminated one have a clearly layered structure. This leads to asymmetric, complementary C-rich and M-rich surfaces on either side of the slab, and hence an overall surface dipole as well as local dipoles on the top/bottom surface layers due to the M/C rich layering.

**Supplementary Fig. S20** | Top-view 2x2 supercells of the (101), (100), (002) and (102) 5-layer slabs of the metal carbides used to calculate the surface energies. Structures for M2C (M =W, Mo, Nb, V) are the 1, 2 3 and 4th row, respectively.

The surface energies (Supplementary Table S6), Esub were calculated as: Esur = ½ (Eslab-Ebulk N) / A, where Eslab is the total energy of the N-layer slab, Ebulk is the total energy of the bulk unit cell, and A is the surface area of said termination. The variation in the surface energies between different slab terminations lies within 0.1 eV/AA2. Deviations from the experimentally observed dominating surfaces are likely due to the level of theory used (a GGA exchange-correlation functional) because of computational efficiency.

**Supplementary Table S6 |** Surface energies (eV/A2) for a 5-layer slab of each TMC.

|  | (101) 5L | (111) | (100) | (002) | (102) |
| --- | --- | --- | --- | --- | --- |
| V2C | 0.26 | 0.25 | 0.28 | 0.37 | 0.28 |
| Nb2C | 0.14 | 0.14 | 0.14 | 0.17 | 0.14 |
| Mo2C | 0.22 | 0.20 | 0.21 |  | 0.23 |
| W2C | 0.27 | 0.23 | 0.24 | 0.28 | 0.29 |

Finally, density of states and charge distribution were evaluated using a more diffuse basis set by means of decreasing the orbital confinement cutoff radii to 0.001 Ry. The density states of the slabs was calculated using the Effective Screening Method (ESM) developed by Otani et al. and implemented in SIESTA36. This method provides a common vacuum reference for the electrostatic potential in vacuum away from the slab for all calculated systems. Thus, the energy scale of the density of states and Fermi levels is aligned to a common reference and hence comparable between the different materials (Supplementary Fig. S21).

We used vacuum-vacuum boundary conditions (bc1) for the electrostatic potential setting the reference zero values of the potential in the vacuum region of the simulation cell, far from the atoms in the slab.

**Supplementary Fig. S21 |** Electrostatic potentials (eV) along the direction perpendicular to the 7-layered (101) terminated **(a)** W2C, **(b)** Mo2C, **(c)** Nb2C, **(d)** V2C slabs, as well as **(e)** Au(111) slab, showing the common vacuum reference for the Fermi level away from the surface as an outcome from the ESM calculations.

Supplementary Fig. S22 shows the Fermi level and 5*d* projected density of states (PDOS) corresponding to the outermost atoms of each slab. The amount of d character states of a metal at the Fermi level indicates the number and the availability of d electrons that could be involved in charge transfer processes. The majority of the 5*d* PDOS of Au (111) surface atoms is ~1.5 eV below its Fermi level in these calculations. On the other hand, at the Fermi level, the W2C (101) surface W atoms have close to 10 times more 5*d* states available.

**Supplementary Fig. S22 |** Comparison of the projected density of states corresponding to 5*d* states of surface atoms for Au (111) and W2C (101), shown together with the Fermi level of each of the slabs.

For analysis of the charge distribution on the surfaces and adsorption free energies of various molecular species on the (101) surface of W2C, we used the Vienna ab initio Simulation Package (VASP, version 5.4.4)37,38. The PAW39 method and PBE40 parametrization of the exchange-correlation functional are used. To account for the van der Waals (vdW) interactions, the dispersion corrected DFT-D341 scheme was employed. The kinetic energy cut-off for the plane-wave basis was set to 600 eV. The energy convergence threshold was set to 10-6 eV. We employed the asymmetric (W- and C-terminated on either side) slab geometry of the unit cells (Supplementary Fig. S23) containing 120 atoms of W2C (80 W-atoms and 40 C-atoms) to have a sufficiently large W-terminated surface area to accommodate surface molecular species avoiding image-image interactions. The same size unit cells (80 M-atoms and 40 C-atoms, where M = V, Mo, Nb) were used for other studied TMCs. All the VASP calculations were performed for neutral non spin-polarized systems and dipolar electrostatic correction was used along the normal to the surface of the slab. The atomic relaxation and unit cell optimization were performed first for a pristine W2C slab with the interslab distance of 50 Å and a fixed cell volume. A conjugate gradient algorithm was used for ionic optimization. Relaxation criterion was set to 10-4 eV for energies and 10-2 eV/Å for forces. To enhance the convergence of the electronic energy, we used Gaussian smearing with σ=0.1 (the difference between total energy and the electronic free energy was less than 1 meV/atom) and due to the large size of the systems, it was sufficient to sample the first Brillouin zone at the Γ-point only. Then various molecular species were optimized atop W-terminated (101) surfaces for fixed cell parameters. Once the atomic structures are optimized we used the tetrahedron method with Blöchl corrections and 1 x 3 x 3 Monkhorst-Pack34 grid k-point sampling for the calculations of total electronic energy (smearing σ=0.1).

As shown in Supplementary Fig. S23, Bader charge analysis indicates that top M-atoms in the (101) M2C slabs are significantly reduced (two types of surface M-atoms0 as compared to M-atoms in the bulk regions. Specifically, Bader charges of (101) W2C top W-atoms are +2 and +0.46 whereas for bulk W-atoms Bader charges are +0.7 to +0.85. This analysis also shows that (101) W2C has the lowest Bader charges among other TMCs.

**Supplementary Fig. S23 | (a)** Distribution of Bader charges in the (101) M2C slabs. Light pink and pink colors correspond to two types of the surface metal atoms. **(b)** Distribution of Bader charges in (101) W2C in the slab. Big and small balls correspond to of W- and C-atoms, and pink and blue colors correspond to positive and negative charges.

The thermal corrections to electronic energies (enthalpic temperature correction, entropy and zero-point vibrational energies) were calculated using vibrational frequencies calculated for slabs with relaxed adsorbed molecular configuration using only the Γ-point sampling. All atoms were free to move.


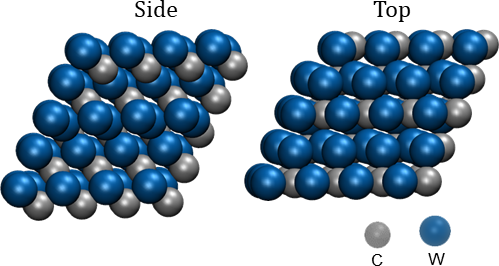


**Supplementary Fig. S24 |** (101) W2C slab geometry used in ab initio calculations.

For these phonon calculations, we used 10–6 eV energy convergence threshold to obtain reliable phonon frequencies (no negative eigenvalues.) To obtain the Free energy, G = H – TS, for the various equilibrium configurations, we used density functional perturbation theory (DFPT). For each of the vibrational modes, , a characteristic vibrational temperature can be expressed as (where *K* is the index of the vibrational mode). If we choose the first vibrational energy level as the zero of energy, then the partition function of this subset of simple harmonic oscillators is expressed as , where the overall partition function, sampling the first Brillouin zone, is . The total vibrational entropy contribution is ). The total ZPE contribution is . The total enthalpy contribution is . The overall vibrational contribution to the free energy, within the simple harmonic oscillator approximation, is .

The identical computational protocol was applied to other studied TMCs: Nb2C, Mo2C, and V2C.

**S12.2 Free Energy Calculations and Computational Hydrogen Electrode Model**

The free energies of CO2 reduction intermediates were approximated by total electronic energies corrected by zero-point vibrational energies, enthalpic temperature corrections and entropy: , where includes the vdW corrections. Established methods42 were used to calculate zero-point energies and vibrational entropies. The free energies of all considered intermediates along with the corrections are listed in Tables S7 and S8. The fundamental assumption in these calculations is that we neglect the solvation energies of all species, and effects of dielectric and ionic screening from the bulk solution (water with KOH:CC (3M:2M) saturated with CO2 gas). We also assume the dilute limit and consider one molecular species per surface slab unit cell.

**Supplementary Table S7 |** Electronic energies (Eelect), obtained at PBE/DFT-D3 level, zero point vibrational energy corrections (ZPE), Enthalpic temperature corrections (), and Entropy contribution (S) to the Gibbs free energies at 298.15 K (G=Eelec++ZPE-TS) for different states along CO2 reduction on W2C (101).

| **Species** | **Eelec, eV** | **ZPE, eV** | **, eV** | **S, eV/K** | **G, eV** |
| --- | --- | --- | --- | --- | --- |
| **W2C**  **(clean 101 surface)** | -1385.433672 | 6.748433 | 4.795152 | 0.032923 | -1383.701141 |
| **CO2*** | -1410.362526 | 7.119794 | 4.859436 | 0.032955 | -1408.203886 |
| **H2O***  **(dissociated state)** | -1402.107001 | 7.38717 | 4.840086 | 0.032879 | -1399.677687 |
| **CO*** | -1402.398986 | 7.010625 | 4.837501 | 0.033088 | -1400.411084 |
| **O*** | -1393.830394 | 6.879771 | 4.827774 | 0.032787 | -1391.893375 |
| **OH*** | -1397.467167 | 7.18209 | 4.836313 | 0.032875 | -1395.245514 |
| **H*** | -1388.910472 | 6.971895 | 4.810434 | 0.032808 | -1386.904927 |
| **HO-CO*** | -1413.377085 | 7.424992 | 4.872422 | 0.033031 | -1410.922909 |
| **OCHO*** | -1414.096905 | 7.408883 | 4.873266 | 0.033088 | -1411.67498 |
| **HCO*** | -1406.343966 | 7.26831 | 4.852955 | 0.03297 | -1404.047761 |
| **H2CO*** | -1410.037936 | 7.553619 | 4.855623 | 0.033018 | -1407.468058 |
| **H3CO* (CH3*+O*)** | -1414.7222 | 7.786552 | 4.89005 | 0.033248 | -1411.953502 |
| **HCOOH***  **(formic acid)** | -1417.148951 | 7.719606 | 4.88698 | 0.033214 | -1414.440137 |
| **H2CO2*** | -1417.432245 | 7.678349 | 4.889048 | 0.033293 | -1414.786162 |
| **CO*+O***  **(dissociated CO2)** | -1411.293803 | 7.086832 | 4.868894 | 0.033008 | -1409.174461 |
| **CH3*** | -1405.972625 | 7.72836 | 4.856605 | 0.033033 | -1403.231494 |

(*) indicates the adsorbed state. When species is unstable, the final state of optimization is shown in parentheses

To account for the effect of the electrified electrode-electrolyte interface and to put all the free energies in the experimentally accessible electrochemical scale we use the computational hydrogen electrode (CHE) model43–45 which relates free energies obtained at zero potential with respect to the reversible hydrogen electrode (RHE) to those at non-zero RHE potential: , where is the electrode potential vs. RHE.

**Supplementary Table S8 |** Chemical potential (µ) of gas phase molecules reported46 and used in the current study

| **Species** | **µ (eV)** |
| --- | --- |
| **CH4 (gas)** | -23.34 |
| **CO2 (gas)** | -23.26 |
| **H2 (gas)** | -6.76 |
| **H2O (gas)** | -14.18 |
| **CO (gas)** | -15.25 |
| **HCOOH (gas)** | -29.96 |

­­

According to the convention in VASP calculation, total electronic energies are referenced to the energies of isolated non-spin-polarized atoms which are used in the generation of the pseudopotentials. As long as the total number of atoms is preserved in the reaction of interest, the differences in free energies of reactions that involve these chemical potentials are valid.

We use CO2 reduction pathways devised both for Cu45 and Mxene47 to design the CO2 conversion path on W2C. Here we limit our analysis to just thermodynamic estimates and do not analyze the kinetics. Thermodynamic reference is made to standard ideal-gas reservoirs of the various reactants and products listed in Supplementary Table S8. For example, adsorption (similarly desorption) energies are computed as where the equivalent clean surface free energy is also referenced (see examples in Supplementary Table S9). According to the CHE, the free energies at vs. RHE of an electrochemical step can be calculated for a reaction , using the free energy difference .

The limiting potential, defined as the least negative potential in which the overall pathway to a product of interest becomes non-endergonic, is calculated using the largest positive change of the free energy (estimated at zero RHE potential) between adjacent steps over the entire pathway (converted to potential by dividing by the number of elementary charge units transferred by the electrode – typically only 1 for individual electrochemical reaction steps). This limiting potential, , can be viewed as a first approximation to the onset potential for a given product of interest, and thus it serves as an estimate of the potential of the overpotential of the reaction. For similar relevant examples of the application of the CHE method to estimate the overpotential, please refer to works by A. Peterson38 and references therein.

The full thermodynamic cycle of the CO2 conversion to methane that contains the lowest free energy pathways, and associated side products produced by electrochemical steps only is shown in Supplementary Fig. S25. Depending on the first protonation step, adsorbed may be converted to either or , with the former being the thermodynamically more favorable outcome, with ΔG = -0.091 eV versus ΔG = +0.661 eV for the latter. However, in these cases the direct (chemical) H* transfer steps to or are thermodynamically more favorable with ΔG = -0.267 eV and ΔG = +0.484 eV, respectively (Supplementary Table S9). The second coupled protonation is an uphill process that may result either in the release of formic acid or production of , with the latter being the least endergonic.

**Supplementary Fig. S25 |** Reaction pathways of the electrochemical conversion of CO2 on (101) surface of W2C. Only coupled (H+ + e-) transfer steps are shown. Free energies at 0 V vs RHE of steps are shown in eV units (red for uphill and blue for downhill processes). Solid black arrows indicate the “Cu-like” reduction pathway; dotted arrows indicate the “MXene-like” pathway. Green arrows indicate the release of the products into the gas phase. the green and yellow balls indicate the limiting steps for the “Cu-like” and “MXene-like” pathways, respectively.

The third protonation on W2C leads to the production of H2 and which brings us back onto the “Cu-like” path of reduction. However, even though the next protonation towards CO* on W2C is similar to that on Cu or Mo2C, the following step remains still downhill with ΔG = -0.256 eV, whereas, on Cu, the conversion is the rate-limiting uphill process with a limiting potential ranging from -0.74 V to -0.97 V vs RHE45. The activation of on Mo2C is easier (ΔG = +0.38 eV) 48, but also remains an uphill process. Moreover, due to the spontaneous water dissociation, the direct H* transfer step on W2C could be even more favorable with the outcome ΔG= -0.433 eV (Supplementary Table S9). Another important difference between Cu, or MXenes, and W2C is that the methoxy radical with oxygen attached to the surface W atom is not stable and spontaneously dissociates into the methyl radical and the surface oxygen atom . Similarly, to Mo2C, the protonation of is the limiting step of the overall reaction (where the lone * refers to the clean surface). However, on W2C (101), the limiting potential of -0.744 V vs RHE is significantly smaller than the reported value of -1.49 V for Mo2C (100) 48. The value of -0.744 V sets the upper boundary for the limiting potential obtained at the low surface coverage limit. However, as shown by previous studies on Mo2C 48, the stability of some surface species, including OH*, can be significantly smaller at increasing coverage, thus reducing the limiting potential. On the other hand, the ease of water dissociation on W2C (101) makes a “poisoning” surface agent that will compete with other surface reactions. In this case, the limiting potential can be determined by other reactions (e.g., ) and can be as small as -0.483 V vs RHE (Supplementary Figs. S26-29).

In contrast to Cu where the desorption of CO* is a relatively easy process (the estimated limiting potential is -0.41 V vs RHE) and the CO desorption itself requires *ca.* 0.3 eV45,49, the desorption of CO* from W2C (101) requires 1.46 eV. This contradicts the CO production and cannot explain its small overpotential (*ca.* 12.7 mV). Therefore, our calculations suggest that the electrocatalytic performance of W2C (101) towards CO2 reduction may be strongly influenced by the competition of electrochemical and chemical reactions and the availability of catalytic sites on the catalyst surface. Specifically, the exergonic chemical dissociation of CO2 (Supplementary Table S9) and the spontaneous adsorption-dissociation of water, acting in concert, may drive the massive CO production () characterized by two jumps at -0.450 V and -0.750 V vs RHE, respectively (Supplementary Table S9). This coupling makes the CO formation weakly dependent on the electrode potential which is also confirmed by our three-electrode electrochemical cell results where a similar trend is observed for CO production on W2C NFs (Supplementary Table S1). The partial CO current (Supplementary Fig. S3) also demonstrates a much weaker dependence of its kinetics on the electrode potential as compared to Cu which suggests that chemical steps play a relevant role in the CO production. For the same reason, the equilibrium of the reaction depends on the reaction which is dependent on the electrode potentials. Therefore, at more negative electrode potentials, the equilibrium will be shifted to the bound CO* which limits the formation of CO at high cathodic potentials and is indeed observed experimentally (Supplementary Table S1).

In Supplementary Figs. S26-29 we show free energies of the possible reactions at vs. RHE and at various limiting potentials . The essential chemical steps and their free energies are listed in Supplementary Table S9.

**Supplementary Fig. S26 |** The lowest free energy path of conversion of CO2 on (101) W2C slab at **(a)** and at **(b)** = -0.744 V vs RHE. The red ball marks the limiting step. Numbers 0 … 10 correspond to the total number of electrons/protons transferred from the electrode/solvent. Blue balls indicate gas-phase products.

**Supplementary Fig. S27 |** The lowest free energy path of conversion of CO2 on (101) W2C slab at **(a)** and at **(b)** = -0.483 V vs RHE. The green ball marks the limiting step. Numbers 0 … 10 correspond to the total number of electrons/protons transferred from the electrode/solvent. Blue balls indicate gas-phase products.

**Supplementary Fig. S28 |** The “Cu-like” free energy path of conversion of CO2 on (101) W2C slab at **(a)** and at **(b)** = -0.744 V vs RHE. The red ball marks the limiting step. Numbers 0 … 8 correspond to the total number of electrons/protons transferred from the electrode/solvent. Blue balls indicate gas-phase products.

**Supplementary Fig. S29 |** The “Cu-like” free energy path of conversion of CO2 on (101) W2C slab at **(a)** and **(b)** at = -0.661 V vs RHE. The green ball marks the limiting step. Numbers 0 … 8 correspond to the total number of electrons/protons transferred from the electrode/solvent. Blue balls indicate gas-phase products.

**Supplementary Table S9 |** Chemical steps on W2C (101) and their free energies

| **Reaction** | **ΔG (eV)** |
| --- | --- |
| , adsorption | -1.242 |
| , adsorption + dissociation | -1.796 |
| , dissociation | -0.971 |
| , desorption | +1.459 |
| , H* transfer step | +0.484 |
| , H* transfer step | -0.267 |
| , H* transfer step | -0.433 |
| , desorption assisted by water adsorption | -0.337 |
| , protonation of surface oxygen | -0.716 |
| , desorption following dissociation of | -0.736 |

**Supplementary Table S10 |** Adsorption energies with respect to gas phase references and **ΔG** of the limiting step reaction for TMCs with indications of spontaneous (diss) or exergonic dissociation of adsorbed species.

|  | **H2O** | **CO2** | **ΔG,** |
| --- | --- | --- | --- |
| **W2C (101)** | -1.796 eV (diss) | -1.24 eV | +0.74 eV |
| **Nb2C (101)** | -1.87 eV (diss) | -1.32 eV | +1.17 eV |
| **Mo2C (101)** | -1.23 eV | -1.62 eV | +1.25 eV |
| **V2C (101)** | -0.59 eV | -0.95 eV | +0.85 eV |

Since CO evolution is an important part of the selective CO2 reduction on W2C, here we discuss the pathways of CO production. In Supplementary Fig. S30 we show the electrochemical steps for CO production.


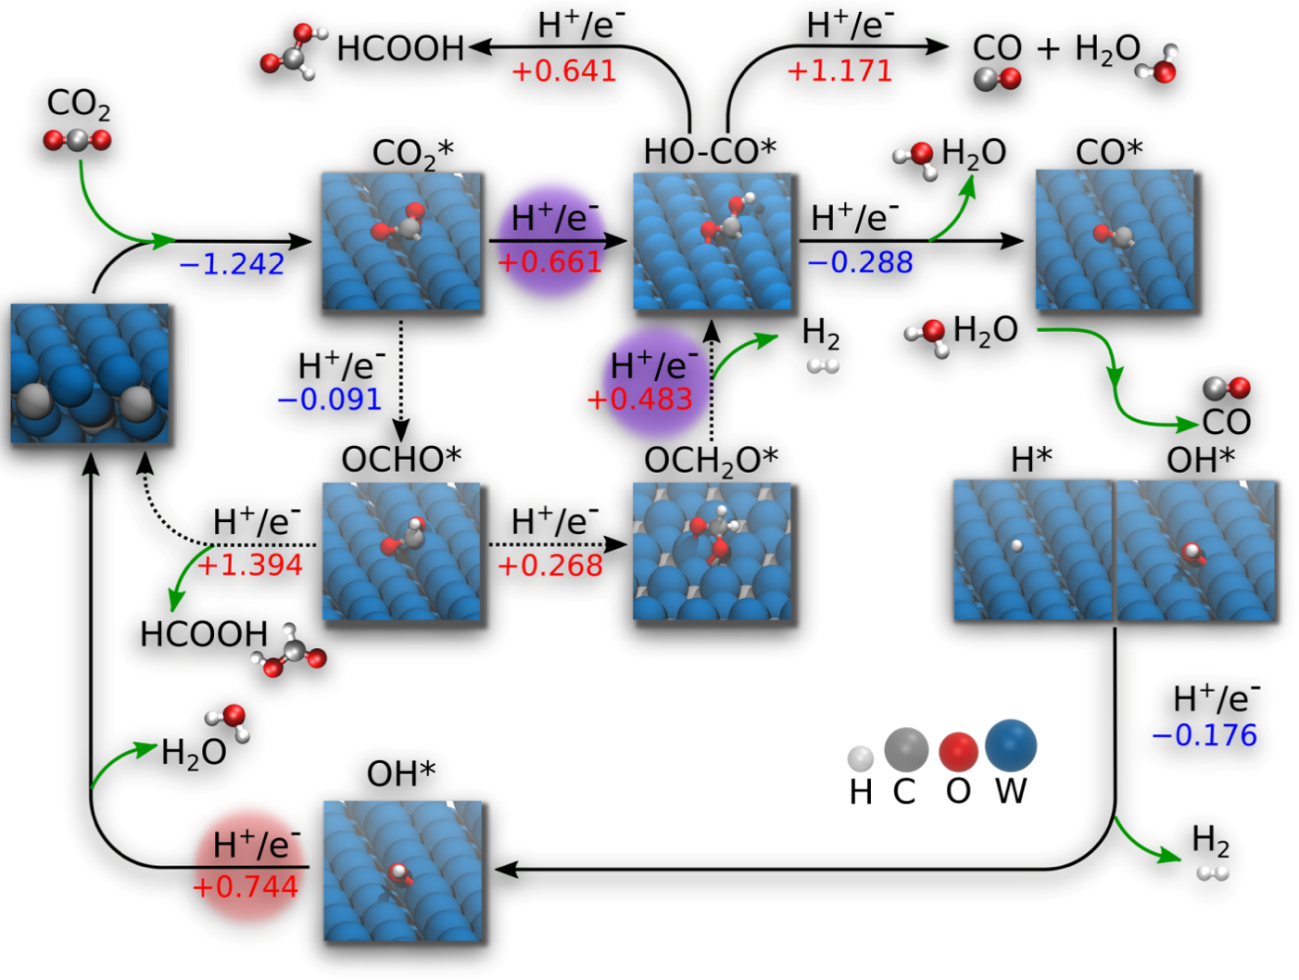


**Supplementary Fig. S30 |** Reaction pathways, a combination of electrochemical (black arrows) and chemical steps (green arrows) of the electrochemical conversion of CO2 to CO on the (101) surface of W2C. Free energy differences between steps are shown in eV units (red for uphill and blue for downhill processes). Solid black arrows indicate the “Cu-like” reduction pathway; dotted arrows indicate the “Mxene-like” pathway. Green arrows indicate the release of the products into the gas phase. Red and magenta balls mark the limiting steps for the “Cu-like” and “TMC-like” pathways, respectively.

In Supplementary Figs. S31-34, we show free energies of the possible reactions of conversion of CO2 to CO at vs. RHE and at various limiting potentials for pathways that combine chemical and electrochemical steps.

**Supplementary Fig. S31 |** The lowest free energy path of conversion of CO2 to CO on (101) W2C slab at **(a)** and at **(b)** = -0.744 V vs RHE. The red ball marks the limiting step. Numbers 0 … 6 correspond to the total number of electrons/protons transferred from electrode/solvent. Blue balls indicate gas-phase products.

**Supplementary Fig. S32 |** The lowest free energy path of conversion of CO2 to CO on (101) W2C slab at **(a)** and at **(b)** = -0.483 V vs RHE. The green ball marks the limiting step. Numbers 0 … 6 correspond to the total number of electrons/protons transferred from the electrode/solvent. Blue balls indicate gas-phase products.

**Supplementary Fig. S33 |** The “Cu-like” free energy path of conversion of CO2 to CO on (101) W2C slab at **(a)** and at **(b)** = -0.744 V vs RHE. The red ball marks the limiting step. Numbers 0 … 4 correspond to the total number of electrons/protons transferred from the electrode/solvent. Blue balls indicate gas-phase products.

**Supplementary Fig. S34 |** The “Cu-like” free energy path of conversion of CO2 to CO on (101) W2C slab at **(a)** and at **(b)** = -0.661 V vs RHE. The green ball marks the limiting step. Numbers 0 … 4 correspond to the total number of electrons/protons transferred from the electrode/solvent. Blue balls indicate gas-phase products.

**S13- Effect of Choline Chloride on the Electrochemical Performance of TMCs**

To investigate the dependence of activity and selectivity of W2C NFs for electrochemical CO2RR on varying concentration of choline chloride, we performed CO2RR using mixed 3 M KOH with different concentrations (0, 0.01, 0.1, 1 and 2 M) of choline chloride (CC). All experiments were performed in the three-electrode electrochemical cell under identical conditions. Prior to each experiment, the cell was first bubbled with Ar and then with CO2, each for 60 min at the flow rate of 50 ml/cm2. The chronoamperometry experiments were performed for the specific amount of time at different potentials. The products of the electrochemical experiments characterized using gas chromatography (GC) and differential electrochemical mass spectroscopy (DEMS). The electrochemical results of W2C NFs in different concentrations of mixed 3 M KOH and choline chloride electrolytes are shown in Supplementary Fig. S35. Supplementary Fig. 35a indicates the current densities of W2C NFs in the different electrolytes. As shown in this figure, adding choline chloride to the 3 M KOH electrolyte increases total activity of W2C NFs in the electrochemical CO2RR. The overall current density and Faradaic efficiency (FE) results of W2C NFs in studied electrolytes are represented in Supplementary Figs. S35a-f. These results reveal that increasing concentration of choline chloride enhances the electrochemical CO2RR and suppresses the competing hydrogen evolution reaction.

**Supplementary Fig. S35 |** Effect of choline chloride (CC) in electrochemical performance of W2C NFs for CO2RR. **(a)** Current density as a function of potential for W2C NFs using different concentrations of choline chloride obtained by chronoamperometry experiments at identical experimental conditions. **(b-f)** Faradaic efficiency (FE) measurements of H2, CO, CH4, C2H4, methanol (MeOH) and ethanol (EtOH) for W2C NFs using mixed 3 M KOH and different concentrations of choline chloride (0, 0.01, 0.1, 1 and 2 M).

**S14- Stability Analysis of Choline Chloride Electrolyte using NMR experiments**

We performed nuclear magnetic resonance (NMR) experiments for fresh and used studied electrolytes to examine the stability of choline chloride in the electrochemical CO2RR. At first, we purged Argon (ultra-high purity grade, Airgas) into the electrolytes with a flow rate of 50 mL/min for 60 min to remove all dissolved gassed from the electrolyte. Then used samples were collected by performing chronoamperometry experiments at a cell potential of -1.05 V for 120 minutes. The NMR samples were prepared by mixing 0.1 mL of each electrolyte and 0.5 mL of D2O solvent. 1H NMR and 13C NMR experiments were carried out with a Bruker Advance III 500 MHz system equipped with DCH cryoprobe. All experiments were carried out at 298 K.

1H NMR spectra of fresh and used electrolytes are shown in Supplementary Fig. S36. The recorded 1H spectra exhibit 5 signals in the aliphatic region for the alkyl chains. The peaks at 3.04 ppm correspond to -CH3 groups which are attached to nitrogen for fresh and used electrolytes. Furthermore, the peaks at 3.26 and 3.87 ppm represent -CH2 groups next to nitrogen and oxygen, respectively. The solvent peak (H2O + D2O) overlaps with the -OH peak and appears at a chemical shift of 4.72 ppm. Moreover, the results for 13C NMR are shown in Supplementary Fig. S37. In all spectra three distinguished peaks of choline chloride were observed. The peak located at 53.71 ppm corresponds to s -CH3 group whereas the -CH2 group peaks appeared at 55.79 and 68.71 ppm. The 1H and 13C NMR spectra reveal similar peak areas and chemical shifts of -CH2 and -CH3 peaks for fresh and used electrolytes that confirm no generation of new diamagnetic species and change in the choline chloride structure and thus verify high stability under applied potential of -1.05 V vs RHE.

**Supplementary Fig. S36** | 1H Nuclear Magnetic Resonance (NMR) results of fresh and used electrolytes **(a)**KOH:CC (3M:0.01M) **(b)** KOH:CC (3M:0.1M) **(c)** KOH:CC (3M:1M) **(d)** KOH:CC (3M:2M).

**Supplementary Fig. S37 |** 13C Nuclear Magnetic Resonance (NMR) results of fresh and used electrolytes **(a)**KOH:CC (3M:0.01M) **(b)** KOH:CC (3M:0.1M) **(c)** KOH:CC (3M:1M) **(d)** KOH:CC (3M:2M).

**S15- 13-C Labeled Carbon Dioxide (13CO2) Experiments**

We have performed electrochemical CO2RR experiments using 13-C labeled CO2 (13CO2) to verify the source of carbon for products such as CH4 in our system. To do this, a custom-made two-compartment three-electrode electrochemical cell filled with the KOH:CC (3M:2M) solution was used to perform the electrochemical CO2RR. The working electrode (cathode) was prepared by drop casting the synthesized W2C NFs on a customized glassy carbon (GC) electrode. Platinum (Pt) gauze 52 mesh (Alfa Aesar) and Ag/AgCl (BASi) were used as counter and reference electrodes, respectively. The cathode and anode parts of the cell were separated by a frit to eliminate the effect of oxidation product at the anode surface. The cell was carefully sealed to prevent any leakage from the head space of the cell. At first, we purged Argon (ultra-high purity grade, Airgas) into the solution with a flow rate of 30 mL/min for 20 min to remove all dissolved gases from the electrolyte. The 13CO2 (Sigma Aldrich) was bubbled into the cell to saturate the electrolyte. Then, we performed the chronoamperometry (CA) experiment at a potential of -0.85 V vs RHE (Supplementary Fig. S38). Once the CA experiment was finished, 2 mL sample from the headspace of the electrochemical cell was collected using a sample locked syringe (Hamilton) and then injected into the differential electrochemical mass spectrometer (DEMS, HPR-40, Hiden Analytical) to analyze the type of products in the cell. These mass spectrometer settings were optimized to detect any possible products with partial pressures as low as 1.0 x 10-13 Torr. We used bar detection mode to measure peak intensities from mass to charge (m/z) ratio from 1 to 60 with the scan rate of 0.2 second per scan (Supplementary Fig. S39). All recorded data were analyzed by MASoft 7 professional software (Hiden Analytical).

The DEMS bar mode analysis of the 2 mL sample is shown in Supplementary Fig. S39. The result of the Supplementary Fig. S39a and b show the DEMS bar diagram results for after and before 2 mL sample injection, respectively. The final data obtained by subtracting DEMS results before and after the sample injection are also shown in Supplementary Fig. S39c, indicating 13-C labeled hydrocarbon products at different m/z ratios. As shown in this figure, two peaks with relatively high intensities are observed at m/z=17 and m/z=29, corresponding to the formation of 13CH4 and 13CO hydrocarbon products. Supplementary Fig. S39c also shows 13C (m/z=13), 13C2H4 (m/z=30), 13CH3OH (m/z=33), 13CO2 (m/z=45) and 13C2H5OH (m/z=48) peaks, suggesting formation of other hydrocarbon products. Moreover, Supplementary Fig. S39c does not show any peaks at m/z=12, 16, 28, 32 and 46 signals (corresponding to 12C, 12CH4, 12CO, 12C2H4, 12CH3OH and 12C2H5OH, respectively), confirming that the injected 13-C labeled CO2 is the only source of the products.

**Supplementary Fig. S38 |** The chronoamperometry (CA) experiment results for W2C NFs in the two-compartment three-electrode electrochemical cell using 13CO2 saturated KOH:CC (3M:2M) electrolyte.

**Supplementary Fig. S39 |** Mass spectroscopy analysis of 2 mL gas sample extracted from sealed two-compartment three-electrode cell. m/z shows mass-to-charge ratio. **(a)** Raw sample data after injecting 2 mL sample to DEMS **(b)** Background data **(c)** Deconvoluted data which is derived from subtracting raw sample data from background data.

To further confirm this, we also measured the partial pressure variation of the possible products as a function of time using the multiple ion detection (MID) mode. This allows us to precisely determine the source of possible formed 13-C labeled hydrocarbon products (13CH4, 13CO, 13C2H4, 13CH3OH, 13CO2 and 13C2H5OH) in this study. To do this, specific m/z ratios were chosen for 13-C products. In detail, m/z ratios of 17, 29, 30, 33, 45 and 48 were selected for detection of 13CH4 (m/z=17), 13CO (m/z=29), 13C2H4 (m/z=30), 13CH3OH (m/z=33), 13CO2 (m/z=45) and 13C2H5OH (m/z=48) respectively. Supplementary Figs. S40a-f show the results of MID mode spectra obtained by injecting 2 mL sample from the headspace of the cell to the DEMS using a sample locked syringe (Hamilton) after the chronoamperometry experiments. As shown in these figures, immediate signal increase is observed for different m/z ratios after the sample injection, confirming that the only source of 13-C labeled formation of products is the 13CO2 gas.

**Supplementary Fig. S40 |** The multiple ion detection (MID) signals of **(a)** 13CH4, **(b)** 13CO, **(c)** 13C2H4, **(d)** 13CH3OH, **(e)** 13CO2 and **(f)** 13C2H5OH obtained in a CA experiment using W2C NFs in 13CO2-saturated KOH:CC (3M:2M) electrolyte in the two-compartment three-electrode cell.

**S16- Continuous Flow Electrolyzer Experiments: Methods and Materials**

A solid polymer electrolyte flow electrolyzer was used to study electrochemical performance of W2C NFs, Au NPs and Cu NPs for continuous electrochemical CO2 reduction reaction. The photos of the flow electrolyzer and different compartments are shown in Supplementary Figs. S41 and S42. As shown in these figures, the working and counter electrodes with geometric surface areas of 5 cm2 were separated using an anion exchange membrane (Sustainion X37-50 Grade RT, Dioxide Materials). A peristaltic pump (Masterflex, Cole-Parmer) was used to continuously pump KOH:CC (3M:2M) (pH = 14.5) with flow rate of 20 ml/min through the anode side. A mass flow controller (SmartTrak 50, Sierra, calibrated with CO2 gas) connected to the humidifier kit, was used to set the flow rate of CO2 at 50 ml/min. The membrane was treated in the electrolyte for 12 hr at 75 °C prior to use.

**Supplementary Fig. S41 |** Photo of the flow electrolyzer used for electrochemical CO2RR testing. The membrane in the flow electrolyzer consists of the working electrode (W2C NFs, Au NPs and Cu NPs) and counter electrode (IrO2 NPs) on either side of the anion exchange membrane (AEM).

**Supplementary Fig. S42 |** The pictures of different parts of the flow electrolyzer.

The cathode electrodes were prepared by mixing 5 mg of each catalysts (W2C NFs, Au NPs and Cu NPs) with 20 ml of isopropyl alcohol in a glass vial. The mixed inks were then sonicated (Branson 2800 ultrasonic processor, Cleanosonic) for 30 minutes and hand-brush coated on gas diffusion layers (GDLs, Sigracet 39, Fuel Cell Store). The actual loadings of 0.1±0.01 mg.cm-2 was determined by weighting the GDLs before and after deposition. IrO2 powder (Sigma Aldrich) was used to prepare anodes following the same method.

The chronoamperometry experiments were performed to study the performance of W2C NFs, Au NPs and Cu NPs in the flow electrolyzer by applying different cell potentials (potential difference between cathode and anode) and simultaneously reading the current. The current densities of different catalysts in the flow cell at cell potentials of -1.5 to -2.3 V are presented in Supplementary Fig. S43. The figure presents average current densities of one-hour experiments at different cell potentials for the studied catalysts.

**Supplementary Fig. S43 |** Current density as function of cell potential for W2C NFs compare to Au and Cu nanoparticles, obtained by chronoamperometry experiments at identical experimental conditions.

The GC and *in situ* DEMS experiments was used to analyze the products of electrochemical CO2RR in the solid polymer electrolyte flow electrolyzer. The FE values at different cell potentials were obtained using the Equation S2. Supplementary Table S11 indicates FE measurements of W2C NFs for different products i.e., H2, CO, CH4, C2H4, CH3OH and C2H5OH in the solid polymer flow electrolyzer at different cell potentials.

**Supplementary Table S11 |** Faradaic efficiency measurements of W2C NFs in the solid polymer electrolyte flow electrolyzer at different cell potentials.

| ***Cell Potential (V)*** | ***FEH2 (%)*** | ***FECO (%)*** | ***FECH4 (%)*** | ***FEC2H4 (%)*** | ***FEMeOH (%)*** | ***FEEtOH(%)*** |
| --- | --- | --- | --- | --- | --- | --- |
| -1.5 | 54.8576 | 40.02105 |  |  |  |  |
| -1.6 | 32.5712 | 43.20585 | 19.17932 | 2.13547 | 0.03226 |  |
| -1.7 | 11.1072 | 50.88655 | 32.35172 | 3.08662 | 0.31283 | 0.07985 |
| -1.8 | 9.3454 | 41.0924 | 42.70344 | 3.67747 | 0.45381 | 0.17725 |
| -1.9 | 8.46437 | 28.3193 | 55.94484 | 4.46296 | 0.60062 | 0.45083 |
| -2 | 4.4288 | 14.79415 | 72.64828 | 5.29993 | 1.1147 | 0.74493 |
| -2.1 | 1.3568 | 6.02105 | 82.70344 | 6.30677 | 1.38742 | 1.20951 |
| -2.2 | 5.7504 | 4.65965 | 78.93792 | 5.61597 | 1.26225 | 1.08218 |
| -2.3 | 12.928 | 1.7731 | 74.82068 | 4.85084 | 1.05752 | 0.92223 |

Supplementary Fig. S44 shows the FE measurements of Au and Cu NPs for CO2RR in the solid polymer flow electrolyzer at different cell potentials.

**Supplementary Fig. S44 |** Faraday Efficiency measurements of **(a)** Au NPs **(b)** Cu NPs for CO2RR in solid polymer electrolyte flow electrolyzer at different cell potentials.

The efficiency of CO2RR using W2C NFs in the solid polymer electrolyte flow electrolyzer at different applied cell potentials was measured using Equation S11.

(Equation S11)

Where the power of CO2RR products is obtained by multiplying the rate of products formation and lower heating values (LHV) of products. The LHV of CO, CH4, C2H4, CH3OH and C2H5OH are 282.98, 802.23, 1322.94, 638.73 and 1235.45 (KJ/mol), respectively. Supplementary Table S12 indicates the measured CO2RR efficiency of W2C NFs at different cell potentials. The results indicate that a maximum efficiency of 62.3% is obtained at a cell potential of -1.7 V.­­

It has been demonstrated that considering the initial and the capital costs of industrially mature solid polymer electrolyte flow electrolyzer and relative prices of fossil fuels and electricity, a CO2RR efficiency of approximately 40 to 50% is required to approach the commercially relevant electrocatalytic CO2RR50–52. As shown in Supplementary Table S12, the efficiency of CO2RR using W2C NFs at the cell potential range between -1.6 to -2.1 is higher than 50% which demonstrates the process is economically feasible.

**Supplementary Table S12 |** CO2RR Efficiency of W2C NFs in the flow electrolyzer at different applied cell potentials.

| ***Cell Potential (V)*** | ***Power of Products (W.cm-2)*** | ***Cell Power Density (W.cm-2)*** | ***CO2RR Efficiency (%)*** |
| --- | --- | --- | --- |
| -1.6 | 0.09919 | 0.197724 | 50.16688 |
| -1.7 | 0.17114 | 0.274601 | 62.32502 |
| -1.8 | 0.22551 | 0.387158 | 58.24897 |
| -1.9 | 0.27878 | 0.512895 | 54.35478 |
| -2 | 0.34312 | 0.654256 | 52.44455 |
| -2.1 | 0.41750 | 0.828035 | 50.42125 |
| -2.2 | 0.45844 | 1.018791 | 44.99854 |
| -2.3 | 0.50386 | 1.295007 | 38.90867 |

­­­­­­­­

We also compared the maximum efficiency of W2C NFs in the CO2RR with state-of-the-art catalysts in the literature (Supplementary Fig. S45)53–57. As shown in Supplementary Fig. S45 W2C NFs exhibits a maximum CO2RR efficiency of 62.3% which is 1.67 and 1.72 times higher than that of Cuoh and Cu-CIPH catalysts, respectively.

**Supplementary Fig. S45 |** CO2RR Efficiency of W2C NFs compared to state-of-the-art catalysts

**S17- Electrochemical Performance of The Solar-Powered Flow Cell: Methods and Materials**

For the standalone self-operating process, the electrochemical flow electrolyzer cell was connected to a triple junction photovoltaic (TJ-PV) solar cell to power the flow electrolyzer with solar energy. Supplementary Fig. S46a indicates the unit of TJ-PV cell. A sun simulator light source was used to provide different sun illumination energies for the TJ-PV cell. Therefore, a preliminary procedure was used to calibrate different sun illumination distances. An InGaAs photodiode (Thorlabs, FDG03-CAL) with a known responsivity calibration curve was used to measure 0.5, 1, 1.5 and 2 sun illuminations energies. The TJ-PV cell was characterized by connecting the PV cell to the potentiostat (CH Instrument 660E). Supplementary Fig. S46b shows j-V curves of the cell obtained at different sun illuminations. The efficiency of TJ-PV cell refers to the ability of solar panel to convert sunlight into electrical energy calculating by Equation S12 where the and are the power of sunlight that hits the solar cell’s surface (1 KW/m2) and maximum power of solar cell, respectively.

(Equation S12)

The results show that at one sun illumination the TJ-PV cell generates a photocurrent density of 13.6 mA/cm2, suggesting a maximum efficiency of 34.3 %.

**Supplementary Fig. S46 |** **(a)** A photo of TJ-PV cell and **(b)** Characterization at different sun illuminations

The flow electrolyzer was coupled to the TJ-PV cell with a surface area of 144 cm2 to supply the required current density of -394.3 mA/cm2 at a cell potential of -2.1 V for the flow electrolyzer with active surface area of 5 cm2. Supplementary Fig. S47 shows the j-V characteristic curve (blue curve) of the TJ-PV cell under one sun illumination (100 mW/cm2). The maximum power point (MPP), shown by the orange dot in Supplementary Fig. S47, indicates a photocurrent of 384.17 mA at a cell potential of 2.42 V. The red curve shown in this figure presents the measured current density of the solar-driven electrolyzer at different applied cell potentials. The operating point for the device is determined by the optimum point at which the two curves intersect (Supplementary Fig. S47). The operating point is chosen to provide a photo current density of -394.3 mA/cm2 at a potential of -2.1 V which has the maximum FE of CH4 (82.7%±2%) calculated in the flow electrolyzer.

**Supplementary Fig. S47 |** Characteristic curve (shown in blue) of the TJ-PV cell under one sun illumination. The red curve also shows the measured current densities at different cell potentials obtained by chronoamperometry experiments.

The measured current density of the flow electrolyzer using W2C NFs at a cell potential of -2.1 V and characterization curves of TJ-PV cell, indicate that approximately ~29 cm2 of the PV cell is needed to supply the required current for 1 cm2 of the flow electrolyzer. The sun to given product efficiency of coupled cell is calculated by using Equation S1358.

(Equation S13)

Where the operating current density and the operating cell potential are obtained by finding the intersection of the TJ-PV and the flow electrolyzer *j*-V curve. is faradaic efficiency of product, which is function of cell potential. The is the lower heating value per mole of product and is the power of solar cell per unit area. The is number of electrons transfer for the given product and is faradaic constant which is 96485.33 C.mol-1. All values are presented in Supplementary Table S13 58. The total sun to fuel efficiency was calculated by the sum of the sun to products efficiencies at the range of cell potentials.

(Equation S14)

**Supplementary Table S13 |** Number of electrons transfer, lower heating values, thermoneutral potentials, and equilibrium potentials for different reactions.

| ***Reaction*** | ***Number of***  ***Electrons*** | ***Equilibrium***  ***Potential (V)*** | ***Thermoneutral***  ***Potential (V)*** | ***Lower Heating***  ***Value (kJ.mol-1)*** |
| --- | --- | --- | --- | --- |
| H2O H2 + ½ O2 | 2 | 1.229 | 1.481 | 241.81 |
| CO2 CO + ½ O2 | 2 | 1.329 | 1.466 | 282.98 |
| CO2 + 2H2O CH4 + 2O2 | 8 | 1.059 | 1.153 | 802.23 |
| 2CO2 + 2H2O C2H4 + 3O2 | 12 | 1.149 | 1.219 | 1322.94 |
| 2CO2 + 4H2O 2CH3OH + 3O2 | 6 | 1.199 | 1.255 | 638.73 |
| 2CO2 + 3H2O C2H5OH + 3O2 | 12 | 1.144 | 1.181 | 1235.45 |

**­­­­­­­­­­­­­­­­­­­­­­­­­­­­­­­­­­­­­­­­­­­­­­­­­­­­­­­­­­­­­­­­­­­­­­­­­­­­­­­­­­­­­­­­­­­­­­­­­­­­­­­­­­­­­­­­**

We also evaluated the long-term performance of W2C NFs in the solar-powered flow electrolyzer by measuring sun to fuels efficiency of the cell in a 700-hour experiment. Supplementary Fig. S48 shows a photo and different compartments of the solar-powered flow electrolyzer experimental setup.

**Supplementary Fig. S48 | (a)** a photo and **(b)** different compartment partsof experimental setup used for solar-driven electrochemical reduction of CO2.s

**References**

1. Guo, L. W. *et al.* Contributions of distinct gold species to catalytic reactivity for carbon monoxide oxidation. *Nat. Commun.* **7**, 13481 (2016).

2. Zhang, S. *et al.* Catalysis on singly dispersed bimetallic sites. *Nat. Commun.* **6**, 7938 (2015).

3. Murdoch, M. *et al.* The effect of gold loading and particle size on photocatalytic hydrogen production from ethanol over Au/TiO2 nanoparticles. *Nat. Chem.* **3**, 489 (2011).

4. Serpell, C. J., Cookson, J., Ozkaya, D. & Beer, P. D. Core@shell bimetallic nanoparticle synthesis via anion coordination. *Nat. Chem.* **3**, 478 (2011).

5. Esmaeilirad, M., Zabihi, M., Shayegan, J. & Khorasheh, F. Oxidation of toluene in humid air by metal oxides supported on Γ-alumina. *J. Hazard. Mater.* **333**, 293–307 (2017).

6. Esmaeilirad, M. *et al.* Oxygen Functionalized Copper Nanoparticles for Solar-Driven Conversion of Carbon Dioxide to Methane. *ACS Nano* **14**, 2099-2108 (2020).

7. Kondori, A. *et al.* Identifying Catalytic Active Sites of Trimolybdenum Phosphide (Mo3P) for Electrochemical Hydrogen Evolution. *Adv. Energy Mater.* **9**, 1900516 (2019).

8. Asadi, M. *et al.* Cathode Based on Molybdenum Disulfide Nanoflakes for Lithium-Oxygen Batteries. *ACS Nano* **10**, 2167–2175 (2016).

9. Zhang, T. *et al.* Highly dispersed, single-site copper catalysts for the electroreduction of CO2 to methane. *J. Electroanal. Chem.* 113862 (2020).

10. Möller, T. *et al.* Efficient CO2 to CO electrolysis on solid Ni–N–C catalysts at industrial current densities. *Energy Environ. Sci.* **12**, 640–647 (2019).

11. Ren, S. *et al.* Molecular electrocatalysts can mediate fast, selective CO2 reduction in a flow cell. *Science* **365**, 367 – 369 (2019).

12. Wu, J. *et al.* A metal-free electrocatalyst for carbon dioxide reduction to multi-carbon hydrocarbons and oxygenates. *Nat. Commun.* **7**, 13869 (2016).

13. De Gregorio, G. L. *et al.* Facet-Dependent Selectivity of Cu Catalysts in Electrochemical CO2 Reduction at Commercially Viable Current Densities. *ACS Catal.* **10**, 4854–4862 (2020).

14. De Luna, P. *et al.* Catalyst electro-redeposition controls morphology and oxidation state for selective carbon dioxide reduction. *Nat. Catal.* **1**, 103–110 (2018).

15. Chen, S. *et al.* Highly Selective Carbon Dioxide Electroreduction on Structure-Evolved Copper Perovskite Oxide toward Methane Production. *ACS Catal.* **10**, 4640–4646 (2020).

16. Wang, X. *et al.* Efficient Methane Electrosynthesis Enabled by Tuning Local CO2 Availability. *J. Am. Chem. Soc.* **142**, 3525–3531 (2020).

17. Weng, Z. *et al.* Active sites of copper-complex catalytic materials for electrochemical carbon dioxide reduction. *Nat. Commun.* **9**, 415 (2018).

18. Manthiram, K., Beberwyck, B. J. & Alivisatos, A. P. Enhanced Electrochemical Methanation of Carbon Dioxide with a Dispersible Nanoscale Copper Catalyst. *J. Am. Chem. Soc.* **136**, 13319-13325 (2014).

19. Zhan, C. *et al.* Computational Screening of MXene Electrodes for Pseudocapacitive Energy Storage. *J. Phys. Chem. C* **123**, 315–321 (2019).

20. Tang, C., Wang, D., Wu, Z. & Duan, B. Tungsten carbide hollow microspheres as electrocatalyst and platinum support for hydrogen evolution reaction. *Int. J. Hydrogen Energy* **40**, 3229–3237 (2015).

21. Krasovskii, P. V *et al.* XPS study of surface chemistry of tungsten carbides nanopowders produced through DC thermal plasma/hydrogen annealing process. *Appl. Surf. Sci.* **339**, 46–54 (2015).

22. Ishii, T., Yamada, K., Osuga, N., Imashiro, Y. & Ozaki, J. Single-Step Synthesis of W2C Nanoparticle-Dispersed Carbon Electrocatalysts for Hydrogen Evolution Reactions Utilizing Phosphate Groups on Carbon Edge Sites. *ACS Omega* **1**, 689–695 (2016).

23. Ba, K. *et al.* Single Faceted Two-Dimensional Mo2C Electrocatalyst for Highly Efficient Nitrogen Fixation. *ACS Catal.* **10**, 7864–7870 (2020).

24. Yang, G., Zhao, J., Yi, S., Wan, X. & Tang, J. Biodegradable and photostable Nb2C MXene quantum dots as promising nanofluorophores for metal ions sensing and fluorescence imaging. *Sensors Actuators B Chem.* **309**, 127735 (2020).

25. Cao, Y. *et al.* Engineered Exosome-Mediated Near-Infrared-II Region V2C Quantum Dot Delivery for Nucleus-Target Low-Temperature Photothermal Therapy. *ACS Nano* **13**, 1499–1510 (2019).

26. Larson A. C., Von Dreele R. B., General Structure Analysis System (GSAS). Los Alamos National Laboratory, Los Alamos, New Mexico (1994).

27. Holzwarth, U. & Gibson, N. The Scherrer equation versus the Debye-Scherrer equation. *Nat. Nanotechnol.* **6**, 534 (2011).

28. Patterson, A. L. The Scherrer Formula for X-Ray Particle Size Determination. *Phys. Rev.* **56**, 978–982 (1939).

29. Kohn, W. & Sham, L. J. Self-Consistent Equations Including Exchange and Correlation Effects. *Phys. Rev.* **140**, A1133–A1138 (1965).

30. Hohenberg, P. & Kohn, W. Inhomogeneous Electron Gas. *Phys. Rev.* **136**, B864–B871 (1964).

31. Sánchez-Portal, D., Ordejón, P., Artacho, E. & Soler, J. M. Density-functional method for very large systems with LCAO basis sets. *Int. J. Quantum Chem.* **65**, 453–461 (1997).

32. Perdew, J. P., Burke, K. & Wang, Y. Generalized gradient approximation for the exchange-correlation hole of a many-electron system. *Phys. Rev. B* **54**, 16533–16539 (1996).

33. Rivero, P. *et al.* Systematic pseudopotentials from reference eigenvalue sets for DFT calculations: Pseudopotential files. *Data Br.* **3**, 21–23 (2015).

34. Monkhorst, H. J. & Pack, J. D. Special points for Brillouin-zone integrations. *Phys. Rev. B* **13**, 5188–5192 (1976).

35. Michaelson, H. B. The work function of the elements and its periodicity. *J. Appl. Phys.* **48**, 4729–4733 (1977).

36. Otani, M. & Sugino, O. First-principles calculations of charged surfaces and interfaces: A plane-wave nonrepeated slab approach. *Phys. Rev. B* **73**, 115407 (2006).

37. Kresse, G. & Hafner, J. Ab initio molecular-dynamics simulation of the liquid-metal--amorphous-semiconductor transition in germanium. *Phys. Rev. B* **49**, 14251–14269 (1994).

38. Kresse, G. & Furthmüller, J. Efficient iterative schemes for ab initio total-energy calculations using a plane-wave basis set. *Phys. Rev. B* **54**, 11169–11186 (1996).

39. Kresse, G. & Joubert, D. From ultrasoft pseudopotentials to the projector augmented-wave method. *Phys. Rev. B* **59**, 1758–1775 (1999).

40. Perdew, J. P., Burke, K. & Ernzerhof, M. Generalized Gradient Approximation Made Simple. *Phys. Rev. Lett.* **77**, 3865–3868 (1996).

41. Grimme, S., Antony, J., Ehrlich, S. & Krieg, H. A consistent and accurate ab initio parametrization of density functional dispersion correction (DFT-D) for the 94 elements H-Pu. *J. Chem. Phys.* **132**, 154104 (2010).

42. Cramer, C. J. *Essentials of computational chemistry: theories and models*. (John Wiley & Sons, 2013).

43. Nørskov, J. K. *et al.* Origin of the Overpotential for Oxygen Reduction at a Fuel-Cell Cathode. *J. Phys. Chem. B* **108**, 17886–17892 (2004).

44. Rossmeisl, J., Logadottir, A. & Nørskov, J. K. Electrolysis of water on (oxidized) metal surfaces. *Chem. Phys.* **319**, 178–184 (2005).

45. Peterson, A. A., Abild-Pedersen, F., Studt, F., Rossmeisl, J. & Nørskov, J. K. How copper catalyzes the electroreduction of carbon dioxide into hydrocarbon fuels. *Energy Environ. Sci.* **3**, 1311–1315 (2010).

46. Lim, D. H. *et al.* Carbon dioxide conversion into hydrocarbon fuels on defective graphene-supported Cu nanoparticles from first principles. *Nanoscale* **6**, 5087–5092 (2014).

47. Li, N. *et al.* Understanding of Electrochemical Mechanisms for CO2 Capture and Conversion into Hydrocarbon Fuels in Transition-Metal Carbides (MXenes). *ACS Nano* **11**, 10825–10833 (2017).

48. Kim, S. K., Zhang, Y. J., Bergstrom, H., Michalsky, R. & Peterson, A. Understanding the Low-Overpotential Production of CH4 from CO2 on Mo2C Catalysts. *ACS Catal.* **6**, 2003–2013 (2016).

49. Kortlever, R., Shen, J., Schouten, K. J. P., Calle-Vallejo, F. & Koper, M. T. M. Catalysts and Reaction Pathways for the Electrochemical Reduction of Carbon Dioxide. *J. Phys. Chem. Lett.* **6**, 4073–4082 (2015).

50. De Luna, P. *et al.* What would it take for renewably powered electrosynthesis to displace petrochemical processes? *Science* **364**, 3506 (2019).

51. Wang, Q., Chen, X., Jha, A. N. & Rogers, H. Natural gas from shale formation – The evolution, evidences and challenges of shale gas revolution in United States. *Renew. Sustain. Energy Rev.* **30**, 1–28 (2014).

52. Parag, Y. & Sovacool, B. K. Electricity market design for the prosumer era. *Nat. Energy* **1**, 16032 (2016).

53. Dinh, C. T. *et al.* CO2 electroreduction to ethylene via hydroxide-mediated copper catalysis at an abrupt interface. *Science* **360**, 783 – 787 (2018).

54. García de Arquer, F. P. *et al.* CO2 electrolysis to multicarabon products at activities greater than 1 A cm−2. *Science* **367**, 661 – 666 (2020).

55. Ringe, S. *et al.* Understanding cation effects in electrochemical CO2 reduction. *Energy Environ. Sci.* **12**, 3001–3014 (2019).

56. Hoang, T. T. H. *et al.* Nanoporous Copper–Silver Alloys by Additive-Controlled Electrodeposition for the Selective Electroreduction of CO2 to Ethylene and Ethanol. *J. Am. Chem. Soc.* **140**, 5791–5797 (2018).

57. Li, F. *et al.* Molecular tuning of CO2-to-ethylene conversion. *Nature* **577**, 509–513 (2020).

58. Singh, M. R., Clark, E. L. & Bell, A. T. Thermodynamic and achievable efficiencies for solar-driven electrochemical reduction of carbon dioxide to transportation fuels. *Proc. Natl. Aca. Sci.* (2015).
